# Supplementary material for: Computational design of double-layer cathode coatings in all-solid-state batteries
Source: Royal Society of Chemistry journal article supplement (doi:10.1039/d1ta04987a), 2021-01-01
Supplement: d1ta04987a1.pdf [file d1ta04987a1.pdf]

***ELECTRONIC SUPPLEMENTARY INFORMATION***

**Computational design of double-layer cathode coatings in  
all-solid-state batteries**

Chuhong Wang,<sup>1</sup> Koutarou Aoyagi,<sup>1</sup> Tim Mueller<sup>1,\*</sup>

<sup>1</sup> Department of Materials Science and Engineering, Johns Hopkins University, Baltimore,  
Maryland 21218, United States

\* Corresponding Author E-mail: [tmueller@jhu.edu](mailto:tmueller@jhu.edu)

**Table S1. Interfacial reaction energies and ab-initio molecular dynamics (AIMD) parameters of coating candidates compatible with a  $\text{Li}_3\text{MnCoNiO}_6$  (NCM) cathode.**

| Materials Project entry id | Composition                                      | Space group | Interfacial reaction energy (meV/atom) with |                      | VASP PAW-PBE potentials |
|----------------------------|--------------------------------------------------|-------------|---------------------------------------------|----------------------|-------------------------|
|                            |                                                  |             | $\text{Li}_3\text{MnCoNiO}_6$               | $\text{LiMnCoNiO}_6$ |                         |
| mp-1205739                 | $\text{Li}_2\text{SnF}_6$                        | P-31m       | 0                                           | 0                    | Li_sv, Sn_d, F          |
| mp-7791                    | $\text{Li}_2\text{GeF}_6$                        | P4_2/mnm    | 0                                           | 0                    | Li_sv, Ge_d, F          |
| mp-12829                   | $\text{LiCaGaF}_6$                               | P-31c       | 0                                           | 0                    | Li_sv, Ca_sv, Ga_d, F   |
| mp-24199                   | $\text{LiHF}_2$                                  | R-3m        | 9                                           | 0                    | Li_sv, H, F             |
| mp-1208619                 | $\text{SrLiGaF}_6$                               | P-31c       | 0                                           | 0                    | Sr_sv, Li_sv, Ga_d, F   |
| mp-6527                    | $\text{Na}_3\text{Li}_3\text{In}_2\text{F}_{12}$ | Ia-3d       | 0                                           | 0                    | Na_pv, Li_sv, In_d, F   |
| mp-7603                    | $\text{Li}_2\text{TiF}_6$                        | P4_2/mnm    | 0                                           | 0                    | Li_sv, Ti_pv, F         |
| mp-561430                  | $\text{LiLuF}_4$                                 | C2/c        | 0                                           | 0                    | Li_sv, Lu_3, F          |
| mp-16577                   | $\text{Li}_2\text{CaHfF}_8$                      | I-4         | 0                                           | 0                    | Li_sv, Ca_sv, Hf_pv, F  |
| mp-1193269                 | $\text{Li}_2\text{SiF}_6$                        | P321        | 0                                           | 0                    | Li_sv, Si, F            |
| mp-29040                   | $\text{Li}_3\text{Zr}_4\text{F}_{19}$            | P-1         | 0                                           | 0                    | Li_sv, Zr_sv, F         |
| mp-6134                    | $\text{LiCaAlF}_6$                               | P-31c       | 0                                           | 0                    | Li_sv, Ca_sv, Al, F     |
| mp-6591                    | $\text{SrLiAlF}_6$                               | P-31c       | 0                                           | 0                    | Sr_sv, Li_sv, Al, F     |
| mp-14363                   | $\text{Rb}_2\text{LiAsO}_4$                      | Cmc2_1      | 0                                           | 0                    | Rb_sv, Li_sv, As, O     |
| mp-6711                    | $\text{Na}_3\text{Li}_3\text{Al}_2\text{F}_{12}$ | Ia-3d       | 0                                           | 0                    | Na_pv, Li_sv, Al, F     |
| mp-3700                    | $\text{LiYF}_4$                                  | I4_1/a      | 0                                           | 0                    | Li_sv, Y_sv, F          |
| mp-4002                    | $\text{Li}_2\text{ZrF}_6$                        | P-31m       | 0                                           | 0                    | Li_sv, Zr_sv, F         |
| mp-10103                   | $\text{LiYbAlF}_6$                               | P-31c       | 0                                           | 0                    | Li_sv, Yb_2, Al, F      |
| mp-1193222                 | $\text{LiMgAlF}_6$                               | P321        | 0                                           | 0                    | Li_sv, Mg_pv, Al, F     |
| mp-15558                   | $\text{Li}_3\text{GaF}_6$                        | C2/c        | 0                                           | 0                    | Li_sv, Ga_d, F          |
| mp-18704                   | $\text{CsLiBeF}_4$                               | P2_1/c      | 0                                           | 0                    | Cs_sv, Li_sv, Be_sv, F  |
| mp-4622                    | $\text{Li}_2\text{BeF}_4$                        | R-3         | 0                                           | 0                    | Li_sv, Be_sv, F         |
| mp-15254                   | $\text{Li}_3\text{AlF}_6$                        | C2/c        | 0                                           | 0                    | Li_sv, Al, F            |
| mp-1211087                 | $\text{LiCdFeF}_6$                               | P-31c       | 0                                           | 0                    | Li_sv, Cd, Fe_pv, F     |
| mp-14023                   | $\text{Na}_3\text{Li}_3\text{Sc}_2\text{F}_{12}$ | Ia-3d       | 0                                           | 0                    | Na_pv, Li_sv, Sc_sv, F  |
| mp-543044                  | $\text{BaLiAlF}_6$                               | P2_1/c      | 0                                           | 0                    | Ba_sv, Li_sv, Al,       |

|            |                                                                 |        |       |   |                           |
|------------|-----------------------------------------------------------------|--------|-------|---|---------------------------|
|            |                                                                 |        |       |   | F                         |
| mp-557327  | Na <sub>3</sub> Li <sub>3</sub> Co <sub>2</sub> F <sub>12</sub> | Ia-3d  | -24.4 | 0 | Na_pv, Li_sv, Co,<br>F    |
| mp-1211093 | LiCaFeF <sub>6</sub>                                            | P-31c  | 0     | 0 | Li_sv, Ca_sv,<br>Fe_pv, F |
| mp-8892    | LiInF <sub>4</sub>                                              | Pbcn   | 0     | 0 | Li_sv, In_d, F            |
| mp-567062  | SrLiFeF <sub>6</sub>                                            | P2_1/c | 0     | 0 | Sr_sv, Li_sv,<br>Fe_pv, F |
| mp-1195868 | LiCeF <sub>5</sub>                                              | I4_1/a | 0     | 0 | Li_sv, Ce, F              |
| mp-561280  | Na <sub>3</sub> Li <sub>3</sub> Fe <sub>2</sub> F <sub>12</sub> | Ia-3d  | 0     | 0 | Na_pv, Li_sv,<br>Fe_pv, F |
| mp-1196169 | LiThF <sub>5</sub>                                              | I4_1/a | 0     | 0 | Li_sv, Th, F              |
| mp-7594    | CsLiF <sub>2</sub>                                              | C2/c   | 0     | 0 | Cs_sv, Li_sv, F           |
| mp-9308    | Li <sub>4</sub> ZrF <sub>8</sub>                                | Pnma   | 0     | 0 | Li_sv, Zr_sv, F           |
| mp-6253    | KLiBeF <sub>4</sub>                                             | P6_3   | 0     | 0 | K_sv, Li_sv,<br>Be_sv, F  |
| mp-1138    | LiF                                                             | Fm-3m  | 0     | 0 | Li_sv, F                  |
| mp-776627  | Li <sub>3</sub> FeF <sub>6</sub>                                | C2/c   | 0     | 0 | Li_sv, Fe_pv, F           |
| mp-1211435 | KLiTbF <sub>5</sub>                                             | P2_1/c | 0     | 0 | K_sv, Li_sv, Tb_3,<br>F   |
| mp-1211585 | KLiGdF <sub>5</sub>                                             | P2_1/c | 0     | 0 | K_sv, Li_sv, Gd, F        |
| mp-1211494 | KLiHoF <sub>5</sub>                                             | P2_1/c | 0     | 0 | K_sv, Li_sv,<br>Ho_3, F   |
| mp-1211461 | KLiDyF <sub>5</sub>                                             | P2_1/c | 0     | 0 | K_sv, Li_sv,<br>Dy_3, F   |
| mp-1211480 | KLiLuF <sub>5</sub>                                             | P2_1/c | 0     | 0 | K_sv, Li_sv, Lu_3,<br>F   |
| mp-560518  | RbLi <sub>2</sub> Be <sub>2</sub> F <sub>7</sub>                | P2_1/c | 0     | 0 | Rb_sv, Li_sv,<br>Be_sv, F |
| mp-557798  | K <sub>5</sub> Li <sub>2</sub> NdF <sub>10</sub>                | Pnma   | 0     | 0 | K_sv, Li_sv,<br>Nd_3, F   |
| mp-1196988 | K <sub>5</sub> Li <sub>2</sub> PrF <sub>10</sub>                | Pnma   | 0     | 0 | K_sv, Li_sv, Pr_3,<br>F   |
| mp-1208634 | SrLiCrF <sub>6</sub>                                            | P-31c  | 0     | 0 | Sr_sv, Li_sv,<br>Cr_pv, F |
| mp-35759   | Li <sub>2</sub> NiF <sub>4</sub>                                | Imma   | 0     | 0 | Li_sv, Ni_pv, F           |
| mp-1212270 | Li <sub>3</sub> Lu(NO <sub>3</sub> ) <sub>6</sub>               | P2_1/c | 0     | 0 | Li_sv, Lu_3, N, O         |
| mp-561330  | Na <sub>3</sub> Li <sub>3</sub> Cr <sub>2</sub> F <sub>12</sub> | Ia-3d  | 0     | 0 | Na_pv, Li_sv,<br>Cr_pv, F |
| mp-28567   | LiBiF <sub>4</sub>                                              | I4_1/a | 0     | 0 | Li_sv, Bi, F              |
| mp-1211098 | LiCrCdF <sub>6</sub>                                            | P-31c  | 0     | 0 | Li_sv, Cr_pv, Cd,<br>F    |
| mp-565544  | BaLiCrF <sub>6</sub>                                            | P2_1/c | 0     | 0 | Ba_sv, Li_sv,<br>Cr_pv, F |
| mp-565468  | LiCaCrF <sub>6</sub>                                            | P-31c  | 0     | 0 | Li_sv, Ca_sv,<br>Cr_pv, F |

|            |                                                   |            |       |   |                          |
|------------|---------------------------------------------------|------------|-------|---|--------------------------|
| mp-720254  | $\text{Li}_2\text{H}_4(\text{SO}_4)_3$            | Pccn       | -23.2 | 0 | Li_sv, H, S, O           |
| mp-29195   | $\text{LiPO}_3$                                   | P2_1/c     | -1    | 0 | Li_sv, P, O              |
| mp-561396  | $\text{Li}_3\text{CrF}_6$                         | C2/c       | 0     | 0 | Li_sv, Cr_pv, F          |
| mp-1211213 | $\text{Li}_3\text{Tb}_3(\text{TeO}_6)_2$          | Ia-3d      | 0     | 0 | Li_sv, Tb_3, Te, O       |
| mp-558059  | $\text{LiMnF}_4$                                  | P2_1/c     | -26.8 | 0 | Li_sv, Mn_pv, F          |
| mp-561011  | $\text{Li}_2\text{Ta}_2(\text{OF}_2)_3$           | P3_121     | 0     | 0 | Li_sv, Ta_pv, O, F       |
| mp-1211152 | $\text{Li}_3\text{Eu}_3(\text{TeO}_6)_2$          | Ia-3d      | 0     | 0 | Li_sv, Eu, Te, O         |
| mp-559129  | $\text{Li}_3\text{Er}(\text{NO}_3)_6$             | P2_1/c     | 0     | 0 | Li_sv, Er_3, N, O        |
| mp-1211772 | $\text{Li}_3\text{Dy}(\text{NO}_3)_6$             | P2_1/c     | 0     | 0 | Li_sv, Dy_3, N, O        |
| mp-1212059 | $\text{Li}_3\text{Tm}(\text{NO}_3)_6$             | P2_1/c     | 0     | 0 | Li_sv, Tm_3, N, O        |
| mp-1212130 | $\text{Li}_3\text{Tb}(\text{NO}_3)_6$             | P2_1/c     | 0     | 0 | Li_sv, Tb_3, N, O        |
| mp-1212476 | $\text{Li}_3\text{Gd}(\text{NO}_3)_6$             | P2_1/c     | 0     | 0 | Li_sv, Gd, N, O          |
| mp-1212171 | $\text{Li}_3\text{Y}(\text{NO}_3)_6$              | P2_1/c     | 0     | 0 | Li_sv, Y_sv, N, O        |
| mp-6726    | $\text{CsLiSO}_4$                                 | P2_1/c     | 0     | 0 | Cs_sv, Li_sv, S, O       |
| mp-1212254 | $\text{Li}_3\text{Yb}(\text{NO}_3)_6$             | P2_1/c     | 0     | 0 | Li_sv, Yb_2, N, O        |
| mp-540946  | $\text{LiReO}_4$                                  | P-1        | 0     | 0 | Li_sv, Re_pv, O          |
| mp-643458  | $\text{LiHSO}_4$                                  | P2_1/c     | -17.6 | 0 | Li_sv, H, S, O           |
| mp-4855    | $\text{Li}_2\text{SeO}_4$                         | R-3        | 0     | 0 | Li_sv, Se, O             |
| mp-30301   | $\text{LiClO}_4$                                  | Pnma       | 0     | 0 | Li_sv, Cl, O             |
| mp-14646   | $\text{Li}_2\text{Mg}_2(\text{SO}_4)_3$           | Pbcn       | 0     | 0 | Li_sv, Mg_pv, S, O       |
| mp-1194281 | $\text{Li}_2\text{Co}(\text{SO}_4)_2$             | P2_1/c     | 0     | 0 | Li_sv, Co, S, O          |
| mp-8180    | $\text{LiNO}_3$                                   | R-3c       | 0     | 0 | Li_sv, N, O              |
| mp-4556    | $\text{Li}_2\text{SO}_4$                          | P2_1/c     | 0     | 0 | Li_sv, S, O              |
| mp-6412    | $\text{Li}_2\text{CuP}_2\text{O}_7$               | C2/c       | 0     | 0 | Li_sv, Cu_pv, P, O       |
| mp-556229  | $\text{Li}_2\text{MnF}_5$                         | C2/c       | -20.1 | 0 | Li_sv, Mn_pv, F          |
| mp-767932  | $\text{Li}_2\text{VF}_6$                          | P4_2/mnm   | 6     | 0 | Li_sv, V_pv, F           |
| mp-24610   | $\text{LiP}(\text{HO}_2)_2$                       | Pna2_1     | 0     | 0 | Li_sv, P, H, O           |
| mp-558902  | $\text{LiMnGaF}_6$                                | P321       | 0     | 0 | Li_sv, Mn_pv, Ga_d, F    |
| mp-1194965 | $\text{Li}_2\text{Th}(\text{AsO}_4)_2$            | P2_1/c     | 0     | 0 | Li_sv, Th, As, O         |
| mp-14484   | $\text{KNaLi}_2(\text{SO}_4)_2$                   | P2_12_12_1 | 0     | 0 | K_sv, Na_pv, Li_sv, S, O |
| mp-6800    | $\text{KLiSO}_4$                                  | P31c       | 0     | 0 | K_sv, Li_sv, S, O        |
| mp-25501   | $\text{LiCrPO}_4\text{F}$                         | P-1        | 0     | 0 | Li_sv, Cr_pv, P, O, F    |
| mp-9657    | $\text{LiAsO}_3$                                  | R-3        | 0     | 0 | Li_sv, As, O             |
| mp-6211    | $\text{RbLiSO}_4$                                 | P2_1/c     | 0     | 0 | Rb_sv, Li_sv, S, O       |
| mp-1195620 | $\text{LiH}_2\text{ClO}_5$                        | C2/c       | 0     | 0 | Li_sv, H, Cl, O          |
| mp-560894  | $\text{Li}_4\text{Be}_3\text{P}_3\text{ClO}_{12}$ | P-43n      | 0     | 0 | Li_sv, Be_sv, P, Cl, O   |

|            |                                                          |            |       |   |                           |
|------------|----------------------------------------------------------|------------|-------|---|---------------------------|
| mp-560072  | $\text{Li}_4\text{Be}_3\text{As}_3\text{ClO}_{12}$       | P-43n      | 0     | 0 | Li_sv, Be_sv, As, Cl, O   |
| mp-1193172 | $\text{Li}_2\text{Mn}(\text{SO}_4)_2$                    | P2_1/c     | 0     | 0 | Li_sv, Mn_pv, S, O        |
| mp-555743  | $\text{LiZnPO}_4$                                        | Cc         | 0     | 0 | Li_sv, Zn, P, O           |
| mp-1196457 | $\text{Li}_2\text{B}_3\text{O}_4\text{F}_3$              | P2_12_12_1 | 0     | 0 | Li_sv, B, O, F            |
| mp-25515   | $\text{LiFePO}_4\text{F}$                                | P-1        | 0     | 0 | Li_sv, Fe_pv, P, O, F     |
| mp-22983   | $\text{LiAlCl}_4$                                        | P2_1/c     | -21.5 | 0 | Li_sv, Al, Cl             |
| mp-1020705 | $\text{Rb}_2\text{Li}_3\text{B}(\text{P}_2\text{O}_7)_2$ | Cmce       | 0     | 0 | Rb_sv, Li_sv, B, P, O     |
| mp-541190  | $\text{Cs}_2\text{LiVO}_4$                               | Cmc2_1     | 0     | 0 | Cs_sv, Li_sv, V_pv, O     |
| mp-28341   | $\text{LiGaCl}_4$                                        | P2_1/c     | 0     | 0 | Li_sv, Ga_d, Cl           |
| mp-18048   | $\text{LiZnAsO}_4$                                       | R3         | 0     | 0 | Li_sv, Zn, As, O          |
| mp-554560  | $\text{Li}_4\text{Be}_3\text{P}_3\text{BrO}_{12}$        | P-43n      | 0     | 0 | Li_sv, Be_sv, P, Br, O    |
| mp-765883  | $\text{LiCrPHO}_5$                                       | P-1        | 0     | 0 | Li_sv, Cr_pv, P, H, O     |
| mp-1019778 | $\text{K}_2\text{Li}_3\text{B}(\text{P}_2\text{O}_7)_2$  | Cmce       | 0     | 0 | K_sv, Li_sv, B, P, O      |
| mp-1185263 | $\text{LiPaO}_3$                                         | Pm-3m      | 0     | 0 | Li_sv, Pa, O              |
| mp-555001  | $\text{LiMnFeF}_6$                                       | P321       | 0     | 0 | Li_sv, Mn_pv, Fe_pv, F    |
| mp-25552   | $\text{LiMnPO}_4\text{F}$                                | P-1        | -10.8 | 0 | Li_sv, Mn_pv, P, O, F     |
| mp-566629  | $\text{Li}_2\text{NiPO}_4\text{F}$                       | Pnma       | 0     | 0 | Li_sv, Ni_pv, P, O, F     |
| mp-1222972 | $\text{Li}_2\text{TiFe}(\text{PO}_4)_3$                  | Pna2_1     | 0     | 0 | Li_sv, Ti_pv, Fe_pv, P, O |
| mp-565827  | $\text{LiMoIO}_6$                                        | P2_1       | 0     | 0 | Li_sv, Mo_pv, I, O        |
| mp-554577  | $\text{Li}_4\text{P}_2\text{O}_7$                        | P2_1/c     | 0     | 0 | Li_sv, P, O               |
| mp-556065  | $\text{Li}_2\text{MoF}_6$                                | P4_2/mnm   | 0     | 0 | Li_sv, Mo_pv, F           |
| mp-1200209 | $\text{Li}_2\text{B}_6\text{O}_9\text{F}_2$              | Cc         | 0     | 0 | Li_sv, B, O, F            |
| mp-23626   | $\text{RbLi}_2(\text{IO}_3)_3$                           | P2_1/c     | 0     | 0 | Rb_sv, Li_sv, I, O        |
| mp-676109  | $\text{Li}_3\text{InCl}_6$                               | C2         | 0     | 0 | Li_sv, In_d, Cl           |
| mp-1201314 | $\text{Li}_8\text{Be}_6\text{P}_7\text{O}_{29}$          | P31c       | -16.1 | 0 | Li_sv, Be_sv, P, O        |
| mp-23384   | $\text{LiIO}_3$                                          | P4_2/n     | 0     | 0 | Li_sv, I, O               |
| mp-1020646 | $\text{NaLi}_2\text{B}(\text{PO}_4)_2$                   | P-1        | 0     | 0 | Na_pv, Li_sv, B, P, O     |
| mp-6113    | $\text{LiTiAsO}_5$                                       | Pnma       | 0     | 0 | Li_sv, Ti_pv, As, O       |
| mp-1192681 | $\text{LiTcH}_6\text{O}_7$                               | P6_3mc     | 0     | 0 | Li_sv, Tc_pv, H, O        |
| mp-25614   | $\text{LiNiPO}_4$                                        | Pnma       | 0     | 0 | Li_sv, Ni_pv, P, O        |
| mp-1222711 | $\text{Li}_2\text{GeTeO}_6$                              | R3         | 0     | 0 | Li_sv, Ge_d, Te, O        |

|            |                                                                 |        |     |   |                           |
|------------|-----------------------------------------------------------------|--------|-----|---|---------------------------|
| mp-1190687 | CsLi <sub>2</sub> Cl <sub>3</sub>                               | Pbcn   | 0   | 0 | Cs_sv, Li_sv, Cl          |
| mp-615884  | CsLiCrO <sub>4</sub>                                            | P2_1/c | 0   | 0 | Cs_sv, Li_sv, Cr_pv, O    |
| mp-771112  | Li <sub>2</sub> Mn <sub>3</sub> NiO <sub>8</sub>                | P4_332 | 0   | 0 | Li_sv, Mn_pv, Ni_pv, O    |
| mp-676361  | Li <sub>3</sub> ErCl <sub>6</sub>                               | P321   | 0   | 0 | Li_sv, Er_3, Cl           |
| mp-1222849 | Li <sub>2</sub> ScP <sub>2</sub> HO <sub>8</sub>                | P2_1   | 0   | 0 | Li_sv, Sc_sv, P, H, O     |
| mp-9144    | LiAsF <sub>6</sub>                                              | R-3    | -17 | 0 | Li_sv, As, F              |
| mp-1080679 | LiTaF <sub>6</sub>                                              | R-3    | 0   | 0 | Li_sv, Ta_pv, F           |
| mp-3980    | LiSbF <sub>6</sub>                                              | R-3    | 0   | 0 | Li_sv, Sb, F              |
| mp-12403   | LiBF <sub>4</sub>                                               | P3_121 | 0   | 0 | Li_sv, B, F               |
| mp-1078799 | LiNbF <sub>6</sub>                                              | R-3    | 0   | 0 | Li_sv, Nb_pv, F           |
| mp-1185319 | LiCl                                                            | P6_3mc | 0   | 0 | Li_sv, Cl                 |
| mp-504360  | Li <sub>9</sub> Cr <sub>3</sub> P <sub>8</sub> O <sub>29</sub>  | P-3c1  | 0   | 0 | Li_sv, Cr_pv, P, O        |
| mp-1222810 | Li <sub>2</sub> InP <sub>2</sub> HO <sub>8</sub>                | P2_1   | 0   | 0 | Li_sv, In_d, P, H, O      |
| mp-24920   | Li <sub>2</sub> CrO <sub>4</sub>                                | R-3    | 0   | 0 | Li_sv, Cr_pv, O           |
| mp-1223017 | Li <sub>2</sub> TiCr(PO <sub>4</sub> ) <sub>3</sub>             | Pna2_1 | 0   | 0 | Li_sv, Ti_pv, Cr_pv, P, O |
| mp-771864  | LiFePHO <sub>5</sub>                                            | P-1    | 0   | 0 | Li_sv, Fe_pv, P, H, O     |
| mp-1210931 | LiFeCl <sub>4</sub>                                             | P2_1/c | 0   | 0 | Li_sv, Fe_pv, Cl          |
| mp-22694   | LiPPbO <sub>4</sub>                                             | Pna2_1 | 0   | 0 | Li_sv, P, Pb_d, O         |
| mp-1020015 | Li <sub>2</sub> B <sub>3</sub> PO <sub>8</sub>                  | P-1    | 0   | 0 | Li_sv, B, P, O            |
| mp-557177  | Li <sub>2</sub> Al(BO <sub>2</sub> ) <sub>5</sub>               | P2_1/c | 0   | 0 | Li_sv, Al, B, O           |
| mp-13725   | Li <sub>3</sub> PO <sub>4</sub>                                 | Pmn2_1 | 0   | 0 | Li_sv, P, O               |
| mp-16828   | Li <sub>3</sub> B <sub>7</sub> O <sub>12</sub>                  | P-1    | 0   | 0 | Li_sv, B, O               |
| mp-31788   | Li <sub>3</sub> Fe <sub>2</sub> (PO <sub>4</sub> ) <sub>3</sub> | P2_1/c | 0   | 0 | Li_sv, Fe_pv, P, O        |
| mp-6565    | Li <sub>3</sub> Sc <sub>2</sub> (PO <sub>4</sub> ) <sub>3</sub> | P2_1/c | 0   | 0 | Li_sv, Sc_sv, P, O        |
| mp-767473  | Li <sub>2</sub> FeP <sub>2</sub> HO <sub>8</sub>                | P2_1   | 0   | 0 | Li_sv, Fe_pv, P, H, O     |
| mp-9625    | LiMgPO <sub>4</sub>                                             | Pnma   | 0   | 0 | Li_sv, Mg_pv, P, O        |
| mp-560104  | LiTaGeO <sub>5</sub>                                            | P2_1/c | 0   | 0 | Li_sv, Ta_pv, Ge_d, O     |
| mp-8673    | Li <sub>2</sub> SnTeO <sub>6</sub>                              | Pnn2   | 0   | 0 | Li_sv, Sn_d, Te, O        |
| mp-565208  | Li <sub>2</sub> U(MoO <sub>5</sub> ) <sub>2</sub>               | P-1    | 0   | 0 | Li_sv, U, Mo_pv, O        |
| mp-863863  | LiCoPO <sub>4</sub>                                             | Cc     | 0   | 0 | Li_sv, Co, P, O           |
| mp-8873    | LiGeBO <sub>4</sub>                                             | I-4    | 0   | 0 | Li_sv, Ge_d, B, O         |
| mp-756117  | Li <sub>2</sub> TiTeO <sub>6</sub>                              | Pnn2   | 0   | 0 | Li_sv, Ti_pv, Te, O       |
| mp-585492  | Li <sub>2</sub> MgMn <sub>3</sub> O <sub>8</sub>                | P4_332 | 0   | 0 | Li_sv, Mg_pv,             |

|            |                                                                  |        |       |   |                           |
|------------|------------------------------------------------------------------|--------|-------|---|---------------------------|
|            |                                                                  |        |       |   | Mn_pv, O                  |
| mp-13843   | Li <sub>2</sub> TeO <sub>4</sub>                                 | P4_122 | 0     | 0 | Li_sv, Te, O              |
| mp-1208625 | SrLiVF <sub>6</sub>                                              | P-31c  | 0     | 0 | Sr_sv, Li_sv,<br>V_pv, F  |
| mp-6425    | Li <sub>3</sub> In <sub>2</sub> (PO <sub>4</sub> ) <sub>3</sub>  | R-3    | 0     | 0 | Li_sv, In_d, P, O         |
| mp-6668    | LiTiPO <sub>5</sub>                                              | Pnma   | 0     | 0 | Li_sv, Ti_pv, P, O        |
| mp-1222525 | LiAlGeO <sub>4</sub>                                             | R3     | 0     | 0 | Li_sv, Al, Ge_d, O        |
| mp-772468  | Li <sub>2</sub> Cr <sub>3</sub> (CoO <sub>6</sub> ) <sub>2</sub> | Pbcn   | -18.2 | 0 | Li_sv, Cr_pv, Co,<br>O    |
| mp-704943  | Li <sub>2</sub> Mn <sub>3</sub> ZnO <sub>8</sub>                 | P2_13  | 0     | 0 | Li_sv, Mn_pv, Zn,<br>O    |
| mp-770932  | LiSbO <sub>3</sub>                                               | C2/m   | 0     | 0 | Li_sv, Sb, O              |
| mp-761940  | Li <sub>2</sub> MnCo <sub>3</sub> O <sub>8</sub>                 | C2     | 0     | 0 | Li_sv, Mn_pv, Co,<br>O    |
| mp-556256  | Li <sub>3</sub> Fe <sub>2</sub> (AsO <sub>4</sub> ) <sub>3</sub> | P2_1/c | 0     | 0 | Li_sv, Fe_pv, As,<br>O    |
| mp-9197    | Li <sub>3</sub> AsO <sub>4</sub>                                 | Pmn2_1 | 0     | 0 | Li_sv, As, O              |
| mp-32316   | Li <sub>2</sub> NiGe <sub>3</sub> O <sub>8</sub>                 | P4_332 | 0     | 0 | Li_sv, Ni_pv,<br>Ge_d, O  |
| mp-25080   | Li <sub>2</sub> MoO <sub>4</sub>                                 | R-3    | 0     | 0 | Li_sv, Mo_pv, O           |
| mp-23985   | LiH <sub>6</sub> BrO <sub>7</sub>                                | P6_3mc | 0     | 0 | Li_sv, H, Br, O           |
| mp-560297  | LiTaSiO <sub>5</sub>                                             | P2_1/c | 0     | 0 | Li_sv, Ta_pv, Si,<br>O    |
| mp-3054    | Li <sub>2</sub> CO <sub>3</sub>                                  | C2/c   | 0     | 0 | Li_sv, C, O               |
| mp-1222477 | LiVZnO <sub>4</sub>                                              | R3     | 0     | 0 | Li_sv, V_pv, Zn,<br>O     |
| mp-774082  | Li(CoO <sub>2</sub> ) <sub>2</sub>                               | P2_1   | 0     | 0 | Li_sv, Co, O              |
| mp-19440   | LiVO <sub>3</sub>                                                | C2/c   | 0     | 0 | Li_sv, V_pv, O            |
| mp-18220   | LiAlSiO <sub>4</sub>                                             | R3     | 0     | 0 | Li_sv, Al, Si, O          |
| mp-562137  | KLiCO <sub>3</sub>                                               | P2_1/c | 0     | 0 | K_sv, Li_sv, C, O         |
| mp-557852  | Na <sub>3</sub> Li <sub>3</sub> V <sub>2</sub> F <sub>12</sub>   | Ia-3d  | 0     | 0 | Na_pv, Li_sv,<br>V_pv, F  |
| mp-14364   | Cs <sub>2</sub> LiAsO <sub>4</sub>                               | Cmc2_1 | 0     | 0 | Cs_sv, Li_sv, As,<br>O    |
| mp-559533  | NaLiCO <sub>3</sub>                                              | P-6    | 0     | 0 | Na_pv, Li_sv, C,<br>O     |
| mp-566323  | RbLiMoO <sub>4</sub>                                             | Cc     | 0     | 0 | Rb_sv, Li_sv,<br>Mo_pv, O |
| mp-762045  | Li <sub>2</sub> Co <sub>3</sub> SbO <sub>8</sub>                 | P4_332 | 0     | 0 | Li_sv, Co, Sb, O          |
| mp-561689  | CsLiMoO <sub>4</sub>                                             | F-43m  | 0     | 0 | Cs_sv, Li_sv,<br>Mo_pv, O |
| mp-18147   | LiGaSiO <sub>4</sub>                                             | R3     | 0     | 0 | Li_sv, Ga_d, Si, O        |
| mp-1210866 | LiVCdF <sub>6</sub>                                              | P-31c  | 0     | 0 | Li_sv, V_pv, Cd, F        |
| mp-1211223 | Li <sub>3</sub> Yb <sub>3</sub> (TeO <sub>6</sub> ) <sub>2</sub> | Ia-3d  | 0     | 0 | Li_sv, Yb_2, Te, O        |

|            |                                         |        |   |   |                           |
|------------|-----------------------------------------|--------|---|---|---------------------------|
| mp-691115  | $\text{Li}_4\text{Mn}_5\text{O}_{12}$   | C2/c   | 0 | 0 | Li_sv, Mn_pv, O           |
| mp-31706   | $\text{Li}_3\text{Cr}_2(\text{PO}_4)_3$ | R-3    | 0 | 0 | Li_sv, Cr_pv, P, O        |
| mp-18741   | $\text{RbLiCrO}_4$                      | P31c   | 0 | 0 | Rb_sv, Li_sv,<br>Cr_pv, O |
| mp-1178391 | $\text{CsLiWO}_4$                       | I-4    | 0 | 0 | Cs_sv, Li_sv,<br>W_pv, O  |
| mp-566105  | $\text{KLiCrO}_4$                       | Pna2_1 | 0 | 0 | K_sv, Li_sv,<br>Cr_pv, O  |
| mp-558045  | $\text{NaLi}_2\text{PO}_4$              | Pnma   | 0 | 0 | Na_pv, Li_sv, P, O        |
| mp-9066    | $\text{NaLi}_2\text{AsO}_4$             | Pmn2_1 | 0 | 0 | Na_pv, Li_sv, As,<br>O    |
| mp-1199453 | $\text{KLiMoO}_4$                       | P6_3   | 0 | 0 | K_sv, Li_sv,<br>Mo_pv, O  |
| mp-1176640 | $\text{LiMnCrO}_4$                      | Imma   | 0 | 0 | Li_sv, Mn_pv,<br>Cr_pv, O |
| mp-1211142 | $\text{Li}_5\text{IO}_6$                | P3_112 | 0 | 0 | Li_sv, I, O               |



**Table S2. Interfacial reaction energies and AIMD parameters of coating candidates compatible with thiophosphate solid electrolytes.**

| Materials<br>Project entry<br>id | Composition                                        | Space group | Interfacial reaction<br>energy (meV/atom) with |                                                   | VASP PAW-PBE<br>potentials |
|----------------------------------|----------------------------------------------------|-------------|------------------------------------------------|---------------------------------------------------|----------------------------|
|                                  |                                                    |             | Li <sub>6</sub> PS <sub>5</sub> Cl             | Li <sub>10</sub> GeP <sub>2</sub> S <sub>12</sub> |                            |
| mp-760415                        | Li <sub>3</sub> SbS <sub>4</sub>                   | I-42m       | 0                                              | 0                                                 | Li_sv, Sb, S               |
| mp-755664                        | Li <sub>2</sub> (TaS <sub>2</sub> ) <sub>3</sub>   | P6_322      | 0                                              | 0                                                 | Li_sv, Ta_pv, S            |
| mp-1045384                       | Li(TiS <sub>2</sub> ) <sub>2</sub>                 | Fd-3m       | 0                                              | 0                                                 | Li_sv, Ti_pv, S            |
| mp-1192995                       | Li <sub>4</sub> MnGe <sub>2</sub> S <sub>7</sub>   | Cc          | -6.2                                           | 0                                                 | Li_sv, Mn_pv, Ge_d, S      |
| mp-1222404                       | LiBiS <sub>2</sub>                                 | R-3m        | 0                                              | 0                                                 | Li_sv, Bi, S               |
| mp-29410                         | Li <sub>2</sub> B <sub>2</sub> S <sub>5</sub>      | Cmcm        | 0                                              | 0                                                 | Li_sv, B, S                |
| mp-19755                         | Li(TiS <sub>2</sub> ) <sub>3</sub>                 | P-3m1       | -3.9                                           | 0                                                 | Li_sv, Ti_pv, S            |
| mp-557962                        | SrLiBS <sub>3</sub>                                | Pnma        | -0.4                                           | 0                                                 | Sr_sv, Li_sv, B, S         |
| mp-1045435                       | Li(MnS <sub>2</sub> ) <sub>2</sub>                 | Imma        | 0                                              | 0                                                 | Li_sv, Mn_pv, S            |
| mp-1222722                       | Li(ZrS <sub>2</sub> ) <sub>2</sub>                 | P2/m        | 0                                              | 0                                                 | Li_sv, Zr_sv, S            |
| mp-853967                        | LiCuS                                              | Fddd        | -3.4                                           | -2.9                                              | Li_sv, Cu_pv, S            |
| mp-1045432                       | Li(CrS <sub>2</sub> ) <sub>2</sub>                 | Imma        | -16.6                                          | -5.8                                              | Li_sv, Cr_pv, S            |
| mp-774459                        | Li <sub>8</sub> Ti <sub>16</sub> CuS <sub>32</sub> | P1          | -1.5                                           | -1.6                                              | Li_sv, Ti_pv, Cu_pv, S     |
| mp-1222482                       | Li <sub>6</sub> AsS <sub>5</sub> I                 | P1          | 0                                              | 0                                                 | Li_sv, As, S, I            |
| mp-644419                        | LiHS                                               | Pmc2_1      | 0                                              | 0                                                 | Li_sv, H, S                |
| mp-1188784                       | Li <sub>2</sub> CdSnS <sub>4</sub>                 | Pmn2_1      | 0                                              | 0                                                 | Li_sv, Cd, Sn_d, S         |
| mp-753720                        | Li <sub>3</sub> BiS <sub>3</sub>                   | R-3         | 0                                              | 0                                                 | Li_sv, Bi, S               |
| mp-3647                          | LiGaS <sub>2</sub>                                 | Pna2_1      | 0                                              | 0                                                 | Li_sv, Ga_d, S             |
| mp-573030                        | Cs <sub>2</sub> LiNbS <sub>4</sub>                 | P-1         | 0                                              | 0                                                 | Cs_sv, Li_sv, Nb_pv, S     |
| mp-1222735                       | Li <sub>2</sub> VCrS <sub>4</sub>                  | C2/m        | 0                                              | 0                                                 | Li_sv, V_pv, Cr_pv, S      |
| mp-767171                        | Li <sub>5</sub> (NbS <sub>2</sub> ) <sub>7</sub>   | C2/c        | 0                                              | 0                                                 | Li_sv, Nb_pv, S            |
| mp-755309                        | Li <sub>3</sub> NbS <sub>4</sub>                   | P-43m       | -0.1                                           | -0.1                                              | Li_sv, Nb_pv, S            |
| mp-754856                        | Li <sub>7</sub> Y <sub>7</sub> ZrS <sub>16</sub>   | P2/m        | 0                                              | 0                                                 | Li_sv, Y_sv, Zr_sv, S      |
| mp-1225894                       | CsLiMnS <sub>2</sub>                               | I-4m2       | -14                                            | -3.5                                              | Cs_sv, Li_sv, Mn_pv, S     |
| mp-28471                         | Li <sub>3</sub> AsS <sub>3</sub>                   | Pna2_1      | 0                                              | 0                                                 | Li_sv, As, S               |
| mp-559814                        | Li <sub>5</sub> SbS <sub>3</sub> I <sub>2</sub>    | Pnnm        | 0                                              | 0                                                 | Li_sv, Sb, S, I            |
| mp-1190364                       | Li <sub>2</sub> SnS <sub>3</sub>                   | C2/c        | -8.4                                           | 0                                                 | Li_sv, Sn_d, S             |
| mp-767218                        | Li <sub>9</sub> (NbS <sub>2</sub> ) <sub>14</sub>  | P-1         | -0.9                                           | 0                                                 | Li_sv, Nb_pv, S            |
| mp-557892                        | BaLi(BS <sub>2</sub> ) <sub>3</sub>                | Cc          | -1.2                                           | 0                                                 | Ba_sv, Li_sv, B, S         |
| mp-644271                        | LiHS                                               | Ama2        | 0                                              | 0                                                 | Li_sv, H, S                |
| mp-1105291                       | Li <sub>2</sub> MnSnS <sub>4</sub>                 | Pc          | 0                                              | 0                                                 | Li_sv, Mn_pv, Sn_d, S      |
| mp-766506                        | Li <sub>3</sub> CuS <sub>2</sub>                   | Ia-3        | 0                                              | 0                                                 | Li_sv, Cu_pv, S            |
| mp-1211176                       | Li <sub>6</sub> AsS <sub>5</sub> I                 | Cc          | 0                                              | 0                                                 | Li_sv, As, S, I            |
| mp-1079885                       | LiSbS <sub>2</sub>                                 | C2/c        | -0.2                                           | 0                                                 | Li_sv, Sb, S               |

|            |                                                                  |          |       |       |                        |
|------------|------------------------------------------------------------------|----------|-------|-------|------------------------|
| mp-753946  | LiCoS <sub>2</sub>                                               | P-3m1    | 0     | 0     | Li_sv, Co, S           |
| mp-554076  | BaLiBS <sub>3</sub>                                              | P2_1/c   | -1.9  | -2    | Ba_sv, Li_sv, B, S     |
| mp-767165  | K <sub>2</sub> LiVS <sub>4</sub>                                 | Cc       | -2.2  | 0     | K_sv, Li_sv, V_pv, S   |
| mp-1210804 | Li <sub>2</sub> ZnGeS <sub>4</sub>                               | Pmn2_1   | -3.9  | 0     | Li_sv, Zn, Ge_d, S     |
| mp-1222582 | Li <sub>4</sub> GeS <sub>4</sub>                                 | Pna2_1   | 0     | 0     | Li_sv, Ge_d, S         |
| mp-1191903 | Li <sub>2</sub> In <sub>2</sub> SiS <sub>6</sub>                 | Cc       | -12.4 | -0.9  | Li_sv, In_d, Si, S     |
| mp-1206881 | LiTaS <sub>2</sub>                                               | P6_3/mmc | -13.6 | -13.7 | Li_sv, Ta_pv, S        |
| mp-558815  | Rb <sub>2</sub> LiVS <sub>4</sub>                                | Fddd     | 0     | 0     | Rb_sv, Li_sv, V_pv, S  |
| mp-1021497 | Li <sub>2</sub> SiSnS <sub>4</sub>                               | I-42m    | 0     | 0     | Li_sv, Si, Sn_d, S     |
| mp-1195603 | Li <sub>2</sub> MnSnS <sub>4</sub>                               | Pna2_1   | 0     | 0     | Li_sv, Mn_pv, Sn_d, S  |
| mp-5614    | Li <sub>3</sub> BS <sub>3</sub>                                  | Pnma     | 0     | 0     | Li_sv, B, S            |
| mp-1194339 | Li <sub>3</sub> SbS <sub>3</sub>                                 | Pna2_1   | 0     | 0     | Li_sv, Sb, S           |
| mp-756490  | Li <sub>6</sub> MnS <sub>4</sub>                                 | P4_2/nmc | -9.2  | -9.2  | Li_sv, Mn_pv, S        |
| mp-1176780 | LiCoS <sub>2</sub>                                               | P2/c     | 0     | 0     | Li_sv, Co, S           |
| mp-14591   | LiSbS <sub>2</sub>                                               | R-3      | -0.2  | 0     | Li_sv, Sb, S           |
| mp-554395  | Na <sub>5</sub> Li <sub>3</sub> (TiS <sub>4</sub> ) <sub>2</sub> | C2/c     | -5.5  | 0     | Na_pv, Li_sv, Ti_pv, S |
| mp-33526   | LiBiS <sub>2</sub>                                               | I4_1/amd | 0     | 0     | Li_sv, Bi, S           |
| mp-19896   | Li <sub>2</sub> GePbS <sub>4</sub>                               | I-42m    | -5.6  | 0     | Li_sv, Ge_d, Pb_d, S   |
| mp-558219  | SrLi(BS <sub>2</sub> ) <sub>3</sub>                              | Cc       | -2.9  | -0.4  | Sr_sv, Li_sv, B, S     |
| mp-1188392 | LiInS <sub>2</sub>                                               | Pna2_1   | 0     | 0     | Li_sv, In_d, S         |
| mp-1189383 | Li <sub>2</sub> CdGeS <sub>4</sub>                               | Pmn2_1   | 0     | 0     | Li_sv, Cd, Ge_d, S     |
| mp-532413  | Li <sub>5</sub> B <sub>7</sub> S <sub>13</sub>                   | Cc       | -1.2  | 0     | Li_sv, B, S            |
| mp-510338  | Cs <sub>2</sub> LiVS <sub>4</sub>                                | Fddd     | 0     | 0     | Cs_sv, Li_sv, V_pv, S  |
| mp-7543    | LiVS <sub>2</sub>                                                | P-3m1    | 0     | 0     | Li_sv, V_pv, S         |
| mp-556085  | Rb <sub>2</sub> LiTaS <sub>4</sub>                               | P-1      | 0     | 0     | Rb_sv, Li_sv, Ta_pv, S |
| mp-553962  | Rb <sub>2</sub> LiNbS <sub>4</sub>                               | P-1      | 0     | 0     | Rb_sv, Li_sv, Nb_pv, S |
| mp-29829   | LiAuS                                                            | Fddd     | -3.8  | 0     | Li_sv, Au, S           |
| mp-555186  | Li <sub>2</sub> ZnSnS <sub>4</sub>                               | Pc       | 0     | 0     | Li_sv, Zn, Sn_d, S     |
| mp-558731  | Li <sub>2</sub> TeS <sub>3</sub>                                 | P2_1/c   | 0     | 0     | Li_sv, Te, S           |
| mp-7936    | LiNbS <sub>2</sub>                                               | P6_3/mmc | -0.2  | -0.2  | Li_sv, Nb_pv, S        |
| mp-1001786 | LiScS <sub>2</sub>                                               | R-3m     | 0     | 0     | Li_sv, Sc_sv, S        |
| mp-1001784 | LiTiS <sub>2</sub>                                               | R-3m     | -5.8  | -5.9  | Li_sv, Ti_pv, S        |
| mp-756006  | LiSbS                                                            | P1       | 0     | 0     | Li_sv, Sb, S           |
| mp-559238  | CsLi <sub>2</sub> BS <sub>3</sub>                                | Pnma     | 0     | 0     | Cs_sv, Li_sv, B, S     |
| mp-1211182 | LiCr <sub>4</sub> InS <sub>8</sub>                               | F-43m    | -18.3 | -4.6  | Li_sv, Cr_pv, In_d, S  |
| mp-767137  | Li <sub>3</sub> Sb <sub>17</sub> S <sub>27</sub>                 | P1       | -5.5  | 0     | Li_sv, Sb, S           |
| mp-15999   | Li <sub>3</sub> AuS <sub>2</sub>                                 | Ibam     | 0     | 0     | Li_sv, Au, S           |
| mp-1153    | Li <sub>2</sub> S                                                | Fm-3m    | 0     | 0     | Li_sv, S               |

|            |                                                                |          |       |      |                       |
|------------|----------------------------------------------------------------|----------|-------|------|-----------------------|
| mp-4226    | LiCrS <sub>2</sub>                                             | P-3m1    | 0     | 0    | Li_sv, Cr_pv, S       |
| mp-766540  | Li <sub>4</sub> TiS <sub>4</sub>                               | Pnma     | -0.6  | 0    | Li_sv, Ti_pv, S       |
| mp-30959   | LiHS                                                           | P4_2/mbc | 0     | 0    | Li_sv, H, S           |
| mp-769032  | Li <sub>3</sub> NbS <sub>4</sub>                               | I-43m    | -0.1  | -0.1 | Li_sv, Nb_pv, S       |
| mp-1106183 | LiAlS <sub>2</sub>                                             | Pna2_1   | 0     | 0    | Li_sv, Al, S          |
| mp-756316  | Li <sub>3</sub> SbS <sub>4</sub>                               | Pmn2_1   | 0     | 0    | Li_sv, Sb, S          |
| mp-1191476 | Li <sub>2</sub> In <sub>2</sub> GeS <sub>6</sub>               | Cc       | -15   | 0    | Li_sv, In_d, Ge_d, S  |
| mp-767088  | Li <sub>3</sub> Sb <sub>11</sub> S <sub>18</sub>               | P1       | -5.2  | 0    | Li_sv, Sb, S          |
| mp-555874  | LiAsS <sub>2</sub>                                             | Cc       | -3.4  | 0    | Li_sv, As, S          |
| mp-861182  | Li <sub>4</sub> TiS <sub>4</sub>                               | I-42m    | -0.6  | 0    | Li_sv, Ti_pv, S       |
| mp-995393  | LiS <sub>4</sub>                                               | P1       | 0     | 0    | Li_sv, S              |
| mp-760375  | Li <sub>3</sub> VS <sub>4</sub>                                | P-43m    | 0     | 0    | Li_sv, V_pv, S        |
| mp-753546  | Li <sub>8</sub> TiS <sub>6</sub>                               | P6_3cm   | 0     | 0    | Li_sv, Ti_pv, S       |
| mp-1177695 | Li <sub>3</sub> CuS <sub>2</sub>                               | Ibam     | 0     | 0    | Li_sv, Cu_pv, S       |
| mp-1225887 | CsLiZnS <sub>2</sub>                                           | I-4m2    | -12.3 | -1.5 | Cs_sv, Li_sv, Zn, S   |
| mp-756198  | Li <sub>14</sub> Mn <sub>2</sub> S <sub>9</sub>                | P-3      | -8.3  | -8.3 | Li_sv, Mn_pv, S       |
| mp-1220728 | NaLi(AsS <sub>2</sub> ) <sub>2</sub>                           | P1       | -3    | 0    | Na_pv, Li_sv, As, S   |
| mp-756811  | Li <sub>4</sub> TiS <sub>4</sub>                               | Cmcm     | -0.6  | 0    | Li_sv, Ti_pv, S       |
| mp-33363   | LiYS <sub>2</sub>                                              | I4_1/amd | 0     | 0    | Li_sv, Y_sv, S        |
| mp-767467  | Li <sub>7</sub> Y <sub>7</sub> Zr <sub>9</sub> S <sub>32</sub> | P1       | 0     | 0    | Li_sv, Y_sv, Zr_sv, S |
| mp-15788   | LiYS <sub>2</sub>                                              | R-3m     | 0     | 0    | Li_sv, Y_sv, S        |

**Table S3. Oxidation voltage limit of coatings compatible with NCM cathode.**

| MP entry id | Composition                              | Oxidation voltage (eV) |
|-------------|------------------------------------------|------------------------|
| mp-556256   | $\text{Li}_3\text{Fe}_2(\text{AsO}_4)_3$ | 4.11                   |
| mp-676109   | $\text{Li}_3\text{InCl}_6$               | 4.42                   |
| mp-676361   | $\text{Li}_3\text{ErCl}_6$               | 4.27                   |
| mp-1210931  | $\text{LiFeCl}_4$                        | 4.14                   |
| mp-561396   | $\text{Li}_3\text{CrF}_6$                | 5.01                   |
| mp-1195868  | $\text{LiCeF}_5$                         | 6.43                   |
| mp-28341    | $\text{LiGaCl}_4$                        | 4.41                   |
| mp-9308     | $\text{Li}_4\text{ZrF}_8$                | 6.38                   |
| mp-31788    | $\text{Li}_3\text{Fe}_2(\text{PO}_4)_3$  | 4.18                   |
| mp-12403    | $\text{LiBF}_4$                          | 7.10                   |
| mp-6425     | $\text{Li}_3\text{In}_2(\text{PO}_4)_3$  | 4.17                   |

**Table S4. Training and validation errors on energies and components of force for the moment tensor potentials after completion of LOTF-MD on 8 benchmark materials. The training errors were computed for all configurations used to train the potentials. For each structure, the validation set contains 100 snapshots (100 ps between each snapshot) from a 10 ns LOTF-MD trajectory for each structure at 700 K.**

| Type                                    | MP entry id | Composition                                                     | Fitting<br>Mean absolute error |                       | Validation<br>Mean absolute error |                       |
|-----------------------------------------|-------------|-----------------------------------------------------------------|--------------------------------|-----------------------|-----------------------------------|-----------------------|
|                                         |             |                                                                 | energy<br>MAE<br>meV/atom      | force<br>MAE<br>meV/Å | energy<br>MAE<br>meV/atom         | force<br>MAE<br>meV/Å |
| Sulfide-based<br>electrolyte<br>coating | mp-1045384  | Li(TiS <sub>2</sub> ) <sub>2</sub>                              | 2.43                           | 137.21                | 4.23                              | 53.33                 |
|                                         | mp-14591    | LiSbS <sub>2</sub>                                              | 2.97                           | 129.16                | 7.44                              | 69.43                 |
|                                         | mp-532413   | Li <sub>5</sub> B <sub>7</sub> S <sub>13</sub>                  | 1.5                            | 124.65                | 5.47                              | 50.63                 |
|                                         | mp-753720   | Li <sub>3</sub> BiS <sub>3</sub>                                | 1.92                           | 83.38                 | 3.4                               | 44.24                 |
| NCM-cathode<br>coating                  | mp-1195868  | LiCeF <sub>5</sub>                                              | 1.25                           | 48.05                 | 19.07                             | 58.46                 |
|                                         | mp-1210931  | LiFeCl <sub>4</sub>                                             | 5.55                           | 85.3                  | 5.64                              | 76.17                 |
|                                         | mp-561396   | Li <sub>3</sub> CrF <sub>6</sub>                                | 0.76                           | 34.52                 | 4.15                              | 45.13                 |
|                                         | mp-6425     | Li <sub>3</sub> In <sub>2</sub> (PO <sub>4</sub> ) <sub>3</sub> | 1.16                           | 59.62                 | 7.45                              | 52.88                 |
| Average                                 |             |                                                                 | 2.19                           | 87.74                 | 7.11                              | 56.28                 |

### Section S1: Estimation of room temperature ionic conductivity cutoff for coating materials screening

Using the Einstein-Nernst equation, we relate the diffusion activation energy to ionic conductivity as a function of temperature:

$$\sigma(T) = \frac{ne^2z^2}{k_B T} D(T) = \frac{ne^2z^2}{k_B T} (fa^2\nu_0) e^{-\frac{E_a}{k_B T}} \quad (\text{S1})$$

where  $n$  is the volume density of the diffusing species,  $e$  is the unit electron charge,  $z$  is the charge of the ionic conductor (here 1 for  $\text{Li}^+$ ),  $k_B$  is Boltzmann's constant,  $f$  is the diffusion correlation coefficient,  $a$  is the average hopping distance,  $\nu_0$  is the Li attempt frequency. We take  $f = 1$ ,  $a = 3 \text{ \AA}$ ,  $\nu_0 = 10^{12} \text{ s}^{-1}$  to be typical for Li ion diffusion and  $n = 0.012 \text{ \AA}^{-3}$  (approximated by the average Li concentration across all simulated structures). Using an activation energy cutoff of 0.7 eV, we calculate the lower bound of ionic conductivity at 300K to be  $6.12 \times 10^{-5} \text{ mS/cm}$ , which is close to the lower bound of acceptable conductivities for thin coating layers we calculated in our previous work.<sup>1</sup>

Reference:

1. C. Wang, K. Aoyagi, P. Wisesa and T. Mueller, *Chem Mater*, 2020, **32**, 3741-3752.
